# Supplementary material for: Canary Bornavirus (Orthobornavirus serini) Infections Are Associated with Clinical Symptoms in Common Canaries (Serinus canaria dom.)
Source: MDPI journal article supplement (doi:10.3390/v14102187), 2022-10-04
Supplement: s1 [file s1]

## Supplementary Materials

**Table S1.** Cross table for the number of canaries with positive or negative in **Macrorhabdus** tests as well as circovirus tests and occurrence of proventricular dilatation disease (PDD)-like signs. Expected counts for perfectly independent variables are given in brackets.

| Test status                      |                       | PDD-like signs present | PDD-like signs absent | Total |
|----------------------------------|-----------------------|------------------------|-----------------------|-------|
| Bornavirus positive <sup>1</sup> | Macrorhabdus positive | 3 (3.4)                | 2 (1.6)               | 5     |
|                                  | Macrorhabdus negative | 18 (17.6)              | 8 (8.4)               | 26    |
|                                  | Total                 | 21                     | 10                    | 31    |
| Bornavirus negative <sup>2</sup> | Macrorhabdus positive | 7 (5.9)                | 21 (22.1)             | 28    |
|                                  | Macrorhabdus negative | 18 (19.1)              | 73 (71.9)             | 91    |
|                                  | Total                 | 25                     | 94                    | 119   |
| All canaries <sup>3</sup>        | Macrorhabdus positive | 10 (10.1)              | 23 (22.9)             | 33    |
|                                  | Macrorhabdus negative | 36 (35.9)              | 81 (81.1)             | 117   |
|                                  | Total                 | 46                     | 104                   | 150   |

<sup>1</sup>p = 1.000 revealed by Fisher's exact test; <sup>2</sup>p = 0.599, revealed by chi-square test; <sup>3</sup>p = 0.959 in *all tested* birds, revealed by chi-square test

**Table S2.** Cross table for the number of canaries with positive or negative in **other yeasts (others than Macrorhabdus)** tests as well as circovirus tests and occurrence of proventricular dilatation disease (PDD)-like signs. Expected counts for perfectly independent variables are given in brackets.

| Test status                      |                       | PDD-like signs present | PDD-like signs absent | Total |
|----------------------------------|-----------------------|------------------------|-----------------------|-------|
| Bornavirus positive <sup>1</sup> | Other yeasts positive | 3 (2.1)                | 0 (.9)                | 3     |
|                                  | Other yeasts negative | 17 (17.9)              | 8 (7.1)               | 25    |
|                                  | Total                 | 20                     | 8                     | 28    |
| Bornavirus negative <sup>2</sup> | Other yeasts positive | 7 (6.2)                | 23 (23.8)             | 30    |
|                                  | Other yeasts negative | 17 (17.8)              | 70 (69.2)             | 87    |
|                                  | Total                 | 24                     | 93                    | 119   |
| All canaries <sup>3</sup>        | Other yeasts positive | 10 (10.0)              | 23 (22.9)             | 33    |
|                                  | Other yeasts negative | 34 (34.0)              | 78 (78.0)             | 112   |
|                                  | Total                 | 44                     | 101                   | 145   |

<sup>1</sup>p = .536 revealed by Fisher's exact test; <sup>2</sup>p = .657 revealed by chi-square test; <sup>3</sup>p = .995 revealed by chi-square test

**Table S3.** Cross table for the number of canaries with positive or negative **in trichomonads** tests as well as circovirus tests and occurrence of proventricular dilatation disease (PDD)-like signs. Expected counts for perfectly independent variables are given in brackets.

| Test status                      |                       | PDD-like signs present | PDD-like signs absent | Total |
|----------------------------------|-----------------------|------------------------|-----------------------|-------|
| Bornavirus positive <sup>1</sup> | Trichomonads positive | 2 (2.0)                | 1 (1.0)               | 3     |
|                                  | Trichomonads negative | 10 (10.0)              | 5 (5.0)               | 15    |
|                                  | Total                 | 12                     | 6                     | 18    |
| Bornavirus negative <sup>2</sup> | Trichomonads positive | 5 (5.9)                | 20 (19.4)             | 25    |
|                                  | Trichomonads negative | 16 (15.1)              | 48 (48.9)             | 64    |
|                                  | Total                 | 21                     | 68                    | 89    |
| All canaries <sup>3</sup>        | Trichomonads positive | 7 (8.6)                | 21 (19.4)             | 28    |
|                                  | Trichomonads negative | 26 (24.4)              | 53 (54.6)             | 79    |
|                                  | Total                 | 33                     | 74                    | 107   |

<sup>1</sup>p = 1.000 revealed by Fisher's exact test; <sup>2</sup>p = 0.618 revealed by chi-square test; <sup>3</sup>p = 0.485 revealed by chi-square test).

**Table S4.** Multivariate linear regression analysis (dependent variable: PDD-signs) using Model 1. predictors: bornavirus PCR and Model 2. bornavirus PCR, source (live clinic patient vs. dead bird).

|                |                         | unstandardized coefficients |                | standardized coefficients | t     | p-value |
|----------------|-------------------------|-----------------------------|----------------|---------------------------|-------|---------|
| Model          |                         | B                           | Standard error | Beta                      |       |         |
| 1 <sup>1</sup> | (constant)              | 0.223                       | 0.034          |                           | 6.567 | 0.000   |
|                | bornavirus PCR          | 0.495                       | 0.076          | 0.423                     | 6.505 | 0.000   |
|                | Adjusted-R <sup>2</sup> | 0.175                       |                |                           |       |         |
| 2 <sup>2</sup> | (constant)              | 0.207                       | 0.049          |                           | 4.189 | 0.000   |
|                | Bornavirus PCR          | 0.503                       | 0.078          | 0.430                     | 6.440 | 0.000   |
|                | Source                  | 0.028                       | 0.062          | 0.030                     | 0.453 | 0.651   |
|                | Adjusted-R <sup>2</sup> | 0.171                       |                |                           |       |         |

<sup>1</sup>Adjusted-R<sup>2</sup> 0.175 <sup>2</sup>Adjusted R<sup>2</sup>0.171
